# Supplementary material for: Deconvolution of Complex DNA Repair (DECODR): Establishing a Novel Deconvolution Algorithm for Comprehensive Analysis of CRISPR-Edited Sanger Sequencing Data
Source: PubMed Central journal article supplement (PMC7898406; doi:10.1089/crispr.2020.0022), 2021-02-19
Supplement: Supp_TableS1.pdf [file Supp_TableS1.pdf]

**Supplemental Table S1: Polymerases and Primers used for PCR amplification of all utilized gene products**

| <b>Gene Target</b> | <b>Polymerase</b> | <b>FWD Primer (5' &gt; 3')</b> | <b>REV Primer (5' &gt; 3')</b> |
|--------------------|-------------------|--------------------------------|--------------------------------|
| GATA1              | Amplitaq          | GGGAGGTGGGAAGGAGAAATATGGAG     | CCTCACAGTGGTATTCTGACCTAGCC     |
| TRM10C             | Phusion           | CATGGCTTACGAAAATTATATG         | GTATCATTTGATCTAAGGTGAG         |
| NRF2               | Q5                | ATTAAACAAGGGTGGGATTTCTTCTC     | AACTCAGGTTAGGTACTGAACTCATCA    |
| Rb1                | Phusion           | CAAAGTCACTGGCGTTGAATTG         | GTGGTAGGATTACAGGCATGAAC        |
| HBG1               | Amplitaq          | CCTTAGAAACCACTGCTAACT          | GATAGTAGCCTTGTCCCTCCTCTG       |
