# Supplementary material for: Deconvolution of Complex DNA Repair (DECODR): Establishing a Novel Deconvolution Algorithm for Comprehensive Analysis of CRISPR-Edited Sanger Sequencing Data
Source: PubMed Central journal article supplement (PMC7898406; doi:10.1089/crispr.2020.0022), 2021-02-19
Supplement: Supp_TableS2.pdf [file Supp_TableS2.pdf]

**Supplemental Table S2: Open Source Software and Libraries used in the development of DECODR**

| Front-End UI Module       |                                                                                                                         | Back-End Computational Module |                                                                                                           |
|---------------------------|-------------------------------------------------------------------------------------------------------------------------|-------------------------------|-----------------------------------------------------------------------------------------------------------|
| <b>React.js</b>           | <a href="https://reactjs.org">https://reactjs.org</a>                                                                   | <b>Django</b>                 | <a href="https://www.djangoproject.com">https://www.djangoproject.com</a>                                 |
| <b>Material UI</b>        | <a href="https://material-ui.com">https://material-ui.com</a>                                                           | <b>Django-cors-headers</b>    | <a href="https://pypi.org/project/django-cors-headers/">https://pypi.org/project/django-cors-headers/</a> |
| <b>Axios</b>              | <a href="https://www.npmjs.com/package/axios">https://www.npmjs.com/package/axios</a>                                   | <b>Django REST Framework</b>  | <a href="https://www.django-rest-framework.org">https://www.django-rest-framework.org</a>                 |
| <b>Bootstrap</b>          | <a href="https://getbootstrap.com">https://getbootstrap.com</a>                                                         | <b>Celery</b>                 | <a href="http://www.celeryproject.org">http://www.celeryproject.org</a>                                   |
| <b>Chart.js</b>           | <a href="https://www.chartjs.org">https://www.chartjs.org</a>                                                           | <b>Redis</b>                  | <a href="https://redis.io/">https://redis.io/</a>                                                         |
| <b>Rc-slider</b>          | <a href="https://www.npmjs.com/package/rc-slider">https://www.npmjs.com/package/rc-slider</a>                           | <b>XlsxWriter</b>             | <a href="https://xlsxwriter.readthedocs.io/">https://xlsxwriter.readthedocs.io/</a>                       |
| <b>React-dropzone</b>     | <a href="https://www.npmjs.com/package/react-dropzone">https://www.npmjs.com/package/react-dropzone</a>                 | <b>jsonpickle</b>             | <a href="https://jsonpickle.github.io/">https://jsonpickle.github.io/</a>                                 |
| <b>Nanobar</b>            | <a href="http://nanobar.jacoborus.codes/">http://nanobar.jacoborus.codes/</a>                                           | <b>BioPython</b>              | <a href="https://biopython.org">https://biopython.org</a>                                                 |
| <b>ReactN</b>             | <a href="https://www.npmjs.com/package/reactn">https://www.npmjs.com/package/reactn</a>                                 | <b>NumPy</b>                  | <a href="https://numpy.org">https://numpy.org</a>                                                         |
| <b>React Sticky Table</b> | <a href="https://www.npmjs.com/package/react-sticky-table">https://www.npmjs.com/package/react-sticky-table</a>         | <b>SciPy</b>                  | <a href="https://www.scipy.org">https://www.scipy.org</a>                                                 |
| <b>React Select</b>       | <a href="https://react-select.com/home">https://react-select.com/home</a>                                               | <b>Matplotlib</b>             | <a href="https://matplotlib.org">https://matplotlib.org</a>                                               |
| <b>React-modal</b>        | <a href="https://www.npmjs.com/package/react-modal">https://www.npmjs.com/package/react-modal</a>                       | <b>Scikit-learn</b>           | <a href="https://scikit-learn.org/stable/">https://scikit-learn.org/stable/</a>                           |
| <b>Reactour</b>           | <a href="https://github.com/elrumordelaluz/reactour/issues/68">https://github.com/elrumordelaluz/reactour/issues/68</a> |                               |                                                                                                           |
